# Supplementary material
Source: PubMed Central journal article supplement (PMC7148562)
Supplement: pnas.2000388117.sapp.pdf [file pnas.2000388117.sapp.pdf]

1

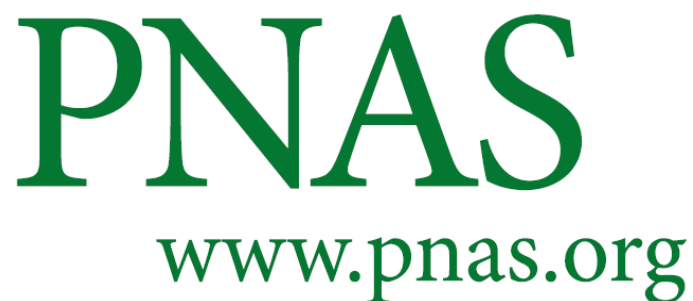

2

3

4

5

6 Supplementary Information for

7

8 **Triad hybridization via a conduit species**

9

10 **Peter R. Grant and B. Rosemary Grant**

11

12 Corresponding author

13

14 **Peter R. Grant**

15

16 Email: [prgrant@princeton.edu](mailto:prgrant@princeton.edu)

17

18

19 **This PDF file includes:**

20

21       Supplementary text

22       Figs. S1 to S2

23       Table S1

24       Captions for datasets S1 to S5

25       References for SI reference citations

26

27 **Other supplementary materials for this manuscript include the following:**

28

29       Datasets S1 to S5

30

1  
2  
3  
4  
5  
6

## 7 **Triad hybridization via a conduit species**

8  
9

Peter R. Grant and B. Rosemary Grant

10

### 11 **Section 1 The problem of identifying species, hybrids and backcrosses**

12 We began a field study of finches on Daphne Major in 1973. Details of how we  
13 recognized and classified the individuals to species are given in reference 1. *G.*  
14 *fortis* and *G. scandens* were easy to distinguish by their blunt or pointed beaks.  
15 We captured a few individuals of *G. fuliginosa* as well, probably immigrants from  
16 Santa Cruz island situated approximately 8 km to the south. They were  
17 morphologically similar to the smallest *G. fortis* on Daphne. To classify them we  
18 used the upper limits to beak size distributions in a large sample on nearby Santa  
19 Cruz island. These limits were considered as a boundary demarcating them from  
20 *G. fortis*, which are distinctly larger than *G. fuliginosa* on Santa Cruz island. Then,  
21 in 1976, we began a breeding study of the finches on Daphne (2). We assumed  
22 that all individuals were members of one of the three species, and none were  
23 hybrids, as explained on p. 130 in reference 1:

24

25 “The way in which inbreeding is studied shows how this problem should be  
26 addressed. Estimated inbreeding coefficients have meaning only in relation to a  
27 base population. The base population, that is the population at the start of a

1 study, is likely to contain an unknown number of inbred individuals and an  
2 unknown number of breeding pairs of related individuals. Nevertheless, it has to  
3 be assumed that members of all mated pairs in the starting (Fo) generation are  
4 unrelated (Falconer 1989). The same principle and practice hold for field studies  
5 of hybridization when hybrid individuals cannot be unambiguously recognized  
6 from their phenotypes (or genotypes) as here. All individuals in the starting  
7 generation are assumed to belong to one species or another, and hybrids are  
8 assumed to be absent.”

9  
10 We found a few instances of interbreeding between *G. fortis* and the other two  
11 species, raising the possibility that some of the breeders were not pure members  
12 of the three species but actually hybrids. However, although apparent hybrids  
13 were produced, they all died either that year or the next one during a severe  
14 drought. Only later, after the El Niño event of 1983 had transformed the  
15 vegetation, did we discover that hybrids could survive long enough to breed (3).  
16 This finding put a different complexion on the initial study of breeding as it raised  
17 again the question of whether some of the initial breeders were in fact hybrids. In  
18 1988 we began collecting small samples of blood for DNA analysis of every bird  
19 we handled, and with assignment tests applied to patterns of microsatellite  
20 variation (see next section) we were able to examine the question of hybrids (4).  
21 The samples included some old birds. The oldest were two *G. scandens* that had  
22 hatched in 1975. Further, we were able to check for extra-pair paternity. We  
23 discovered that some finches of each of the three species were admixtures of the  
24 genomes of two or more species. Some of the assignments confirmed our  
25 identifications from pedigrees, whereas others did not. Therefore, some of the

1 initial breeders that were not genotyped could plausibly have been hybrids,  
2 meaning  $F_1$ s and backcrosses. As a consequence, individuals identified as species  
3 may in fact have been hybrids, and our classification of particular hybrids from  
4 pedigree data may have been erroneous if their parents were not pure species  
5 but hybrids. Unfortunately, we had no genetic data from the initial study and  
6 therefore, in the absence of information to the contrary, we had to assume that  
7 all breeders were pure members of the respective (phenotypic) species.  
8 Subsequent analyses confirmed the presence of hybrids in our earlier samples  
9 (Table 1 main text), and identified extra-pair mating as one way in which hybrids  
10 were produced (5)

11

12

## 13 **Section 2 The genetic signal of microsatellite-based assignments**

14 In a previous paper on the finches of Daphne Major island (4) we used alleles at  
15 fourteen unlinked, polymorphic, autosomal loci and the program STRUCTURE to  
16 assign individuals to species and hybrids (admixtures). Species were initially  
17 identified by morphology, and then individuals were recognized as members of  
18 one of the three species when the probability of assignment to a species reached  
19 or exceeded a threshold of 0.90. If the 0.90 criterion was not met they were  
20 assigned to hybrids. The value is arbitrary, although often used (6-9), and was  
21 chosen as a compromise between precision and inclusiveness. The choice  
22 recognizes that markers are not diagnostic, and genotyping errors add further  
23 uncertainty. Separating individuals into classes ( $F_1$  and backcrosses) was found to  
24 be unreliable. McFarlane and Pemberton in reference 10 refer to choosing a  
25 threshold for delimiting species and hybrids as a balancing act between type I

1 errors and type II errors --- mistakenly assigning parental species individuals to a  
2 hybrid and assigning a hybrid individual to a parental species. Advanced  
3 backcrosses will be treated as parental species if a high level of type II errors is  
4 accepted, as may be the case with 0.90. Thus, the 0.90 threshold is conservative  
5 in the sense of probably underestimating the true frequency of admixtures.

6  
7 In the main text we use the 14 autosomal loci plus two sex-linked loci because sex  
8 ratios are not likely to be biased with large samples. Long-standing coexistence  
9 with hybridization suggests long-standing backcrossing. Evidence for this is the  
10 high frequency of assignment probabilities in the range 0.90 to 0.99 (Fig. S1), in  
11 both species, and the increase in these frequencies through time, in agreement  
12 with other evidence presented in the main text (Fig. 2). Following reference 10 we  
13 used the range of 0.37 to 0.63 probabilities as an approximate guide to the  
14 expected frequencies of  $F_1$  hybrids. They constitute only 2.3 percent ( $N = 74$ ) of  
15 the total 3165 genotyped individuals, or 19.0 percent of the 390 hybrids.  
16 Corresponding figures for the backcrosses ( $P = 0.64-0.89$ ) are 8.2 percent of the  
17 total or 66.2 percent of the hybrids. The remainder, trihybrids, are 1.8 percent of  
18 the total or 14.9 percent of the hybrids.

19

### 20 **Section 3 Concordance of phenotypic and genetic classifications**

21 The degree to which classifications based on morphology and microsatellites are  
22 congruent provides a measure of consistency, reliability and usefulness of the  
23 classification. Ninety-three percent of phenotypic *G. fortis* ( $N = 1195$ ) were  
24 classified as *G. fortis* by microsatellite assignments. A similar proportion (92  
25 percent) of measured *G. scandens* individuals ( $N = 391$ ) were classified as *G.*

1 *scandens* by both methods. Most of the remaining *G. fortis* (44/85) were classified  
2 as Ff and most of the remaining *G. scandens* (19/33) were classified as SF hybrids  
3 by microsatellites. The classifications were less consistent with *G. fuliginosa*. Sixty-  
4 one percent of 26 individuals were classified by both methods as *G. fuliginosa*,  
5 and most of the remainder (6/9) were assigned to Ff hybrids by microsatellites.  
6 Classification is least consistent with hybrids. Among pedigree-assigned Ff hybrids  
7 identified in the pedigrees, 0.46 were assigned to admixtures by microsatellites  
8 and the remainder to *G. fortis*. Among the FS hybrids identified in the pedigrees,  
9 0.27 were assigned by microsatellites to admixtures and the remainder to *G. fortis*  
10 or *G. scandens*. Some hybrid identities were wrongly determined from the  
11 pedigrees because interbreeding individuals were incorrectly assumed to be non-  
12 hybrids in the absence of information to the contrary (*SI Appendix*, section 1).

13

14 Another measure of reliability is the degree to which parents and offspring are  
15 classified in the same way by phenotype and microsatellite assignments.  
16 Consistency reflects inheritance of the defining allelic compositions of the  
17 parents. Ninety-seven percent of genotypically *G. fortis* x *G. fortis* parents ( $N =$   
18 598) produced only *G. fortis* offspring, and ninety-nine percent of genotypically *G.*  
19 *scandens* x *G. scandens* parents ( $N = 174$ ) produced only *G. scandens* offspring.  
20 The few remaining pairs produced admixed offspring as a result of random  
21 segregation of parental genes in combinations that have affinities to another  
22 species.

23

## 24 **Section 4 Morphology**

1 We used principal components analysis (PCA) to compare hybrids and species. We  
2 used morphological criteria to classify individuals to the three species in view of  
3 difficulties in distinguishing *G. fuliginosa* from Ff hybrids. We restricted the  
4 analysis of morphological variation among species to the period 1975-98, before  
5 introgression had proceeded far. However, we included all individuals identified  
6 as hybrids by microstallites across the whole period, 1978-2012. The total number  
7 of individuals was 1225. PC1 from an analysis of weight, wing length and tarsus  
8 length provides a measure of body size (Table S1). Loadings of all three measures  
9 are large, almost equal and positive. PC1 from an analysis of beak length, depth  
10 and width provides a measure of beak size, and again all loadings are large and  
11 positive. PC2 is a measure of beak pointedness or beak shape --- pointedness or  
12 bluntness: the loading of beak length is opposite in sign to the loadings of depth  
13 and width.

14

## 15 **Section 5 Fitness**

16 Di- and trihybrids differ in survival from the parental species to a small extent  
17 (main text). When the two sets of hybrids are combined with the species that  
18 gave rise to them, according to maximum probabilities of assignment, the  
19 difference between hybrids and species disappears in both the *G. fortis* group  
20 (main text, Fig. 5) and the *G. scandens* group (Fig. S2).

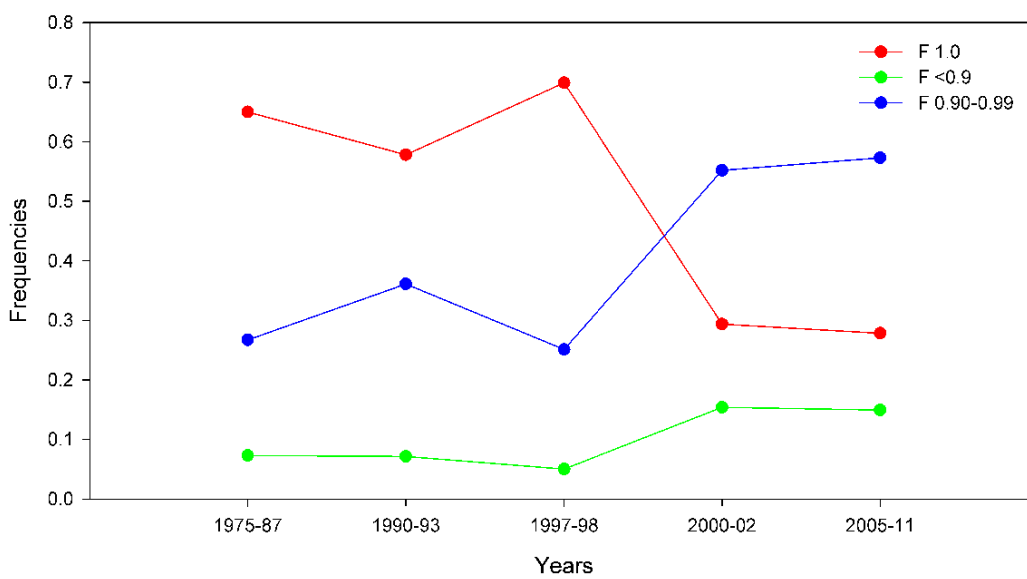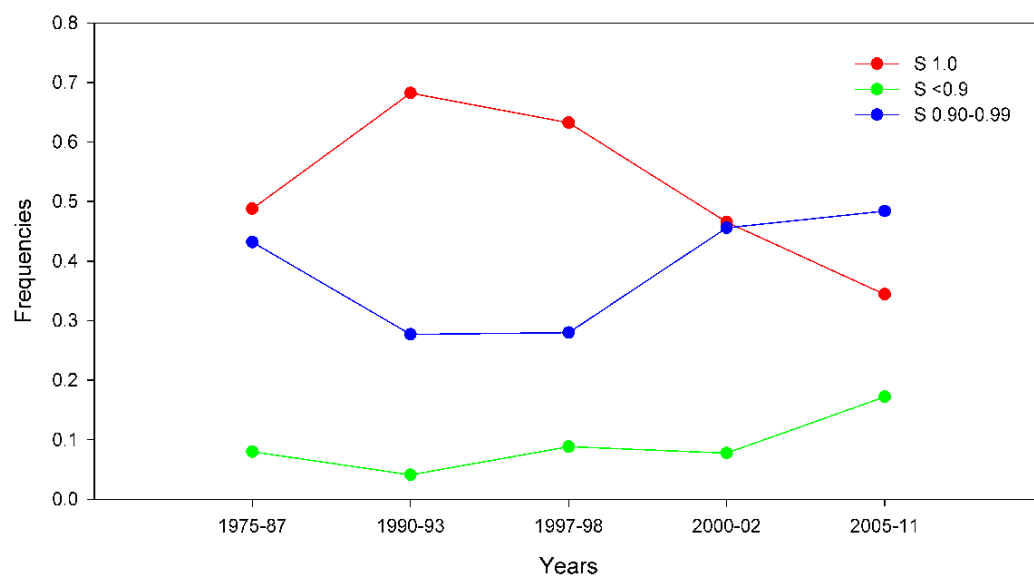

1

2

3



1 **Fig. S1.** Frequencies of individuals assigned to *G. fortis* (above) and *G. scandens*  
2 (below), with probabilities of 1.0 (red), 0.90-0.99 (blue) and 0.50 -0.90 (green).  
3 Sample sizes are 2182 *G. fortis* (F) and 1114 *G. scandens* (S).

4  
5  
6  
7  
8  
9  
10

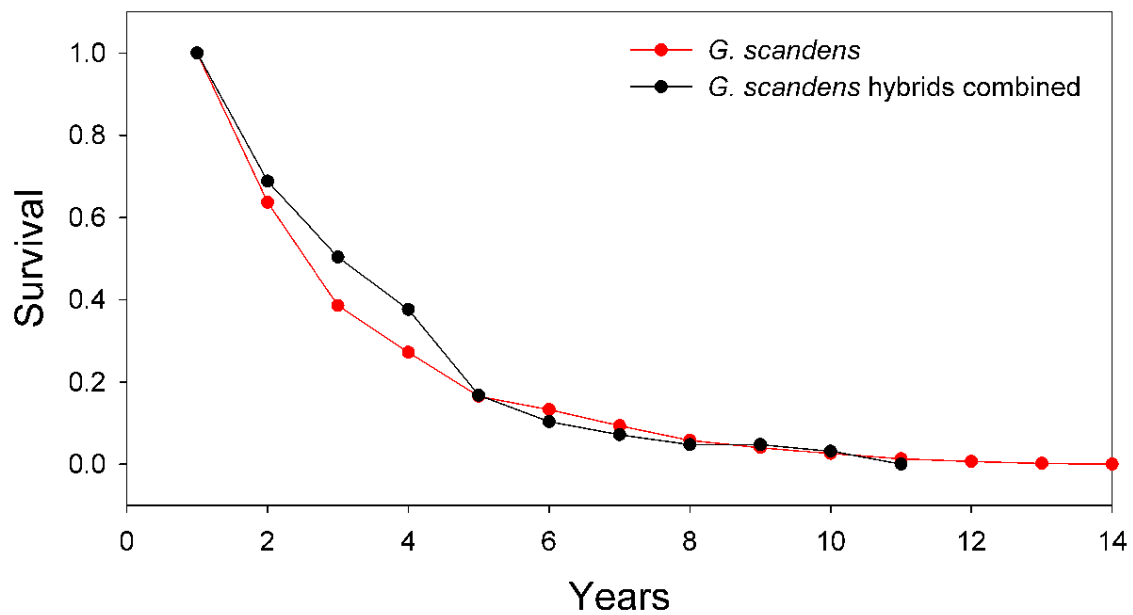

11  
12  
13 **Fig. S2.** Survival of the combined groups of *G. scandens* hybrids is almost identical  
14 to the survival of *G. scandens*.

1

2 **Table S1. Results of two separate principal components analyses of body size**  
 3 **and beak traits of 1225 finches. Numbers are loadings of the original variables**  
 4 **on the principal components axes.**

|                  | PC1 body | PC1 beak size | PC2 beak shape |
|------------------|----------|---------------|----------------|
| Percent variance | 83.3     | 73.5          | 22.8           |
| Weight           | 0.9290   | .             | .              |
| Wing             | 0.9081   | .             | .              |
| Tarsus           | 0.9013   | .             | .              |
| Beak length      | .        | 0.6764        | 0.7364         |
| Beak depth       | .        | 0.9300        | -0.2861        |
| Beak width       | .        | 0.9396        | -0.2471        |

5

6

7

### 8 **Captions for datasets S1 to S5**

9

10 Dataset S1. Dataset for Fig. 2. Frequency of hybrids produced each year of  
 11 breeding. Hybrids are expressed as frequencies of the offspring produced in each  
 12 of the *G. fortis* groups (*G. fortis*, Ff, FS) and *G. scandens* groups (*G. scandens*, SF,  
 13 Sf, fS).

1  
2 Dataset S2. Dataset for Fig. 3. Genetic convergence across five periods (1975-87,  
3 1990-93, 1997-98, 2000-02, 2005-2011) separated by years of little or no breeding.

4  
5 Dataset S3. Dataset for Fig. 4 and Tables 3 and 4. Morphological measurements of  
6 *G. fuliginosa*, *G. fortis* and *G. scandens* and hybrids.

7  
8 Dataset S4. Dataset for Fig. 5 and S2. Survival of di- and trihybrids in relation to  
9 *G. fortis* and *G. scandens* from year 1 in the years 1987-2010.

10  
11 Dataset S5. Dataset for Fig. S1. Frequencies of individuals assigned to *G. fortis* and  
12 *G. scandens* with probabilities of 1.0, 0.90-0.99 and 0.50 -0.90. Sample sizes are  
13 2182 *G. fortis* and 1114 *G. scandens*.

14

15

16

17

18

19

20

21

## 22 **References**

23

- 24 1. P. R. Grant, Hybridization of Darwin's finches on Isla Daphne Major,  
25 Galápagos. *Philos. Trans. R. Soc. B* **340**, 127-139 (1993).
- 26 2. P. T. Boag, P. R. Grant, Darwin's Finches (*Geospiza*) on Daphne Major,  
27 Galápagos: breeding and feeding ecology in a climatically variable  
28 environment. *Ecol. Monogr.* **54**, 463-489 (1984).

- 1       3. H. L. Gibbs, P. R. Grant, J. Weiland, Breeding of Darwin's Finches at an  
2           unusually early age in an El Niño year. *Auk* **101**, 872-874 (1984).
- 3       4. P. R. Grant, B. R. Grant, Conspecific versus heterospecific gene exchange  
4           between populations of Darwin's finches. *Philos. Trans. R. Soc. B* **365** 1065-  
5           1076 (2010).
- 6       5. P. R. Grant, B. R., Adult sex ratio influences mate choice in Darwin's finches.  
7           *Proc. Natl. Acad. Sci. USA* **116**, 12373-12382 (2019)
- 8       6. M. R. Kronforst, L. G. Young, L. M. Blume, L. E. Gilbert, Multilocus analyses  
9           of admixtures and introgression among hybridizing butterflies. *Evolution*  
10          **60**, 1254-1268 (2006).
- 11      7. M. L. Lancaster, N. J. Gemmell, S. Negro, S. Goldworthy, Ménage à trois on  
12          Macquarie Island: hybridization among three species of fur seal  
13          (*Arctocephalus* spp.) following historical population extinction. *Mol. Ecol.*  
14          **15**, 3681-3692 (2006).
- 15      8. J. Fogelqvist, A. V. Verkhozina, A. I. Katyshev, P. Pucholt, C. Dixelius, A. C.  
16          Rönneberg-Wästljung, M. Lascoux, S. Berlin, Genetic and morphological  
17          evidence of introgression between three species of willows. *BMC Evol. Biol.*  
18          **15**, 193 (2015).
- 19      9. M. L. Haines, J. Melville, J. Sumner, N. Clemann, D. G. Chapple, D. Stuart-  
20          Fox, Geographic variation in hybridization and ecological differentiation  
21          between three syntopic, morphologically similar species of montane lizards.  
22          *Mol. Ecol.* **25**, 2887-2903 (2016).
- 23      10. S. E. McFarlane, J. M. Pemberton, Detecting the true extent of  
24          introgression during anthropogenic hybridization. *Trends Ecol. Evol.* **34**,  
25          315-326 (2019).
